# Supplementary material for: Viscoelastic nanocomposite composed of titania nanosheets: multiple conductometric sensitivities
Source: Royal Society of Chemistry journal article supplement (doi:10.1039/c1dt10686d), 2011-01-01
Supplement: c1dt10686d.pdf [file c1dt10686d.pdf]

Supplementary material (ESI) for Dalton Transactions

This journal is © The Royal Society of Chemistry 2011

## Electronic Supplementary Information (ESI†)

### Viscoelastic Nanocomposite Composed of Titania Nanosheets: Multiple Conductometric Sensitivities

Yukihiro Yoshida,<sup>\*a</sup> Kazuya Kai,<sup>b</sup> Hiroshi Kageyama<sup>bc</sup> and Gunzi Saito<sup>a</sup>

<sup>a</sup> *Research Institute, Meijo University, Shiogamaguchi 1-501 Tempaku-ku, Nagoya 468-8502, Japan. Fax: +81-52-833-7200; Tel: +81-52-838-2552; E-mail: yyoshida@meijo-u.ac.jp*

<sup>b</sup> *Department of Energy & Hydrocarbon Chemistry, Graduate School of Engineering, Kyoto University, Nishikyo-ku, Kyoto 615-8510, Japan*

<sup>c</sup> *Institute for Integrated Cell-Materials Science, Kyoto University, Sakyo-ku, Kyoto 606-8501, Japan*

**Measurements.** FT-IR spectra were measured on KBr pellets or in dispersed KBr pellets with a Perkin-Elmer 1000 Series spectrophotometer. UV-Vis-NIR spectra were measured on quartz substrates using a Shimadzu UV-3100 spectrophotometer. Fluorescence emission spectra were recorded on quartz substrates using a Horiba FluoroMax-4P spectrofluorometer. Excitation wavelength is 250 nm. EDS experiments were conducted with a JEOL JSM-5510LVN Scanning Electron Microscope operated at 20 kV. The nanocomposite was mounted onto carbon tape. Powder XRD measurements were carried out with a MAC Science M18XHF diffractometer using Cu K $\alpha$  radiation at a scanning rate of 0.01° s<sup>-1</sup> in a 2 $\theta$  range of 5–80°. Rheology measurements were conducted on a Thermo Scientific HAAKE MARS rheometer at 25 °C. The moduli  $G'$  and  $G''$  were measured on frequency sweep from 10<sup>2</sup> and 10<sup>-3</sup> Hz under a constant strain of 0.1%, and on strain sweep from 10<sup>-2</sup> to 5% at a constant frequency of 1 Hz. Ionic conductivities were measured using a Wayne Kerr impedance analyzer 6440B over the frequency range between 20 Hz and 3 MHz. The nanocomposite was filled in a conductivity cell constructed with a pair of ITO glasses (surface resistance: 10  $\Omega/\square$ ) as electrodes and acetate films as a spacer (cell constant: 6.0  $\times 10^{-2}$  cm<sup>-1</sup>), and the cell was placed in a temperature (25–80 °C) and humidity (50–95% RH) controlled chamber

Supplementary material (ESI) for Dalton Transactions

This journal is © The Royal Society of Chemistry 2011

ESPEC SH-221. A 200 W Xe lamp (San-ei Electric, XEF-501S) was used as the white light source, and a UV intensity of *ca.* 50 mW cm<sup>-2</sup> was determined with a solarmeter (San-ei Electric, ANS-001).

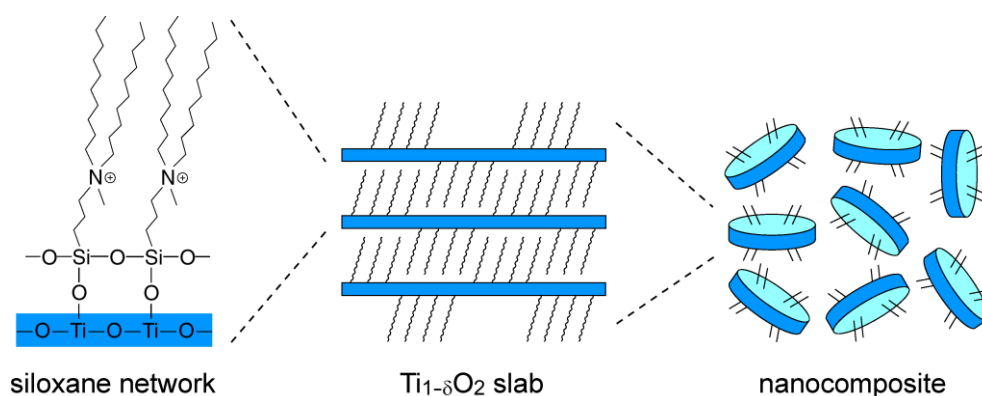

**Figure S1.** Schematic models of a siloxane graft network imprinted on a Ti<sub>1-δ</sub>O<sub>2</sub> nanosheet (left), a Ti<sub>1-δ</sub>O<sub>2</sub> slab (middle), and the nanocomposite structure (right).

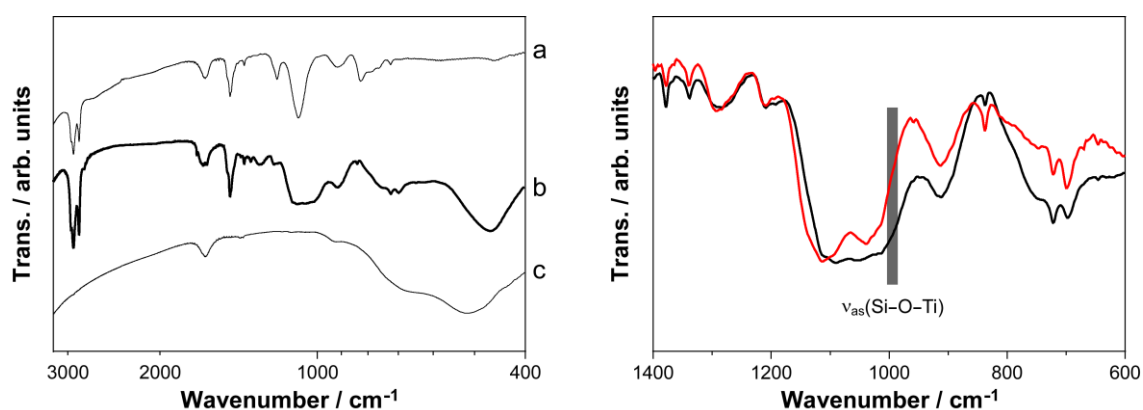

**Figure S2.** (Left) Infrared spectra of (a) [(CH<sub>3</sub>O)<sub>3</sub>Si(CH<sub>2</sub>)<sub>3</sub>N(CH<sub>3</sub>)(C<sub>10</sub>H<sub>21</sub>)<sub>2</sub>]<sub>2</sub>Cl, (b) WNC, and (c) layered protonated Ti<sub>1-δ</sub>O<sub>2</sub>, dispersed in compressed KBr pellets. (right) Enlarged spectra of WNC (black line) and nanocomposite prepared by adding [(CH<sub>3</sub>O)<sub>3</sub>Si(CH<sub>2</sub>)<sub>3</sub>N(CH<sub>3</sub>)(C<sub>10</sub>H<sub>21</sub>)<sub>2</sub>]<sub>2</sub>Cl methanol solution to tetramethylammonium hydroxide aqueous solution (red line) in the frequency range of 600–1400 cm<sup>-1</sup>.

Supplementary material (ESI) for Dalton Transactions

This journal is © The Royal Society of Chemistry 2011

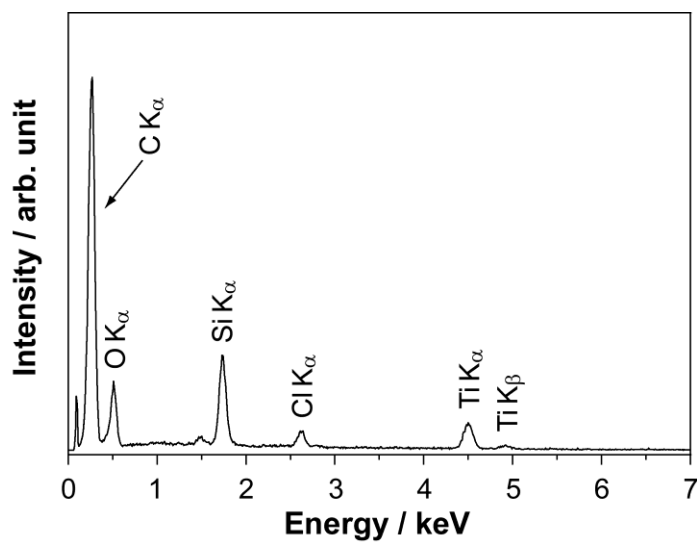

**Figure S3.** EDS spectrum of DNC.

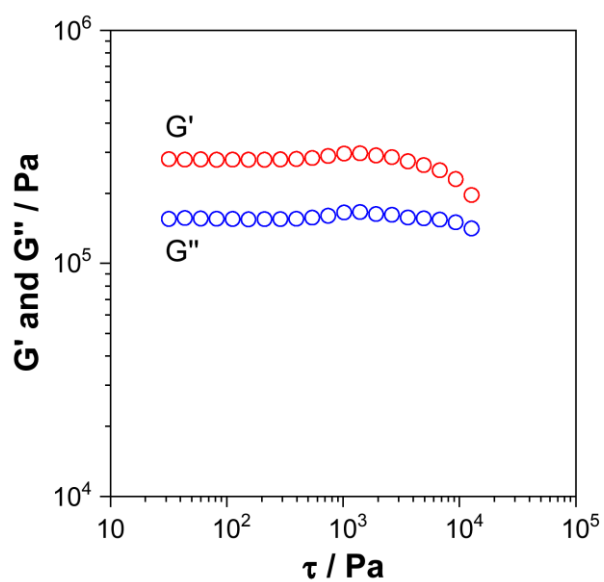

**Figure S4.** Stress dependences of dynamic storage ( $G'$ , red circles) and shear-loss ( $G''$ , blue circles) moduli of WNC at a constant frequency of 1 Hz at 25 °C.

Supplementary material (ESI) for Dalton Transactions

This journal is © The Royal Society of Chemistry 2011

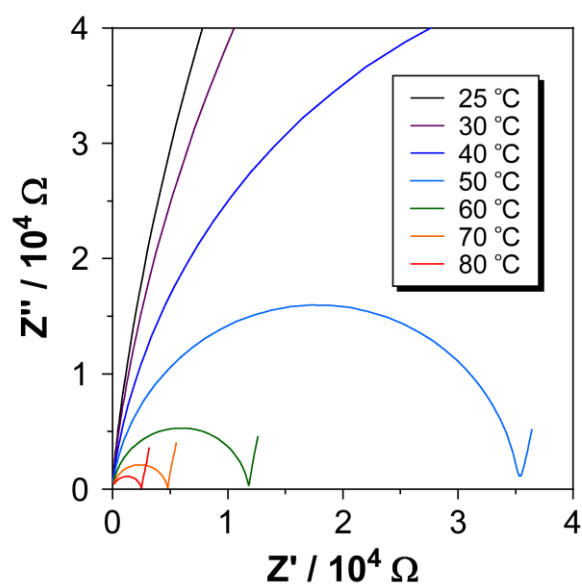

**Figure S5.** Impedance Cole-Cole plots of the nanocomposite under 50% RH, as a function of temperature.

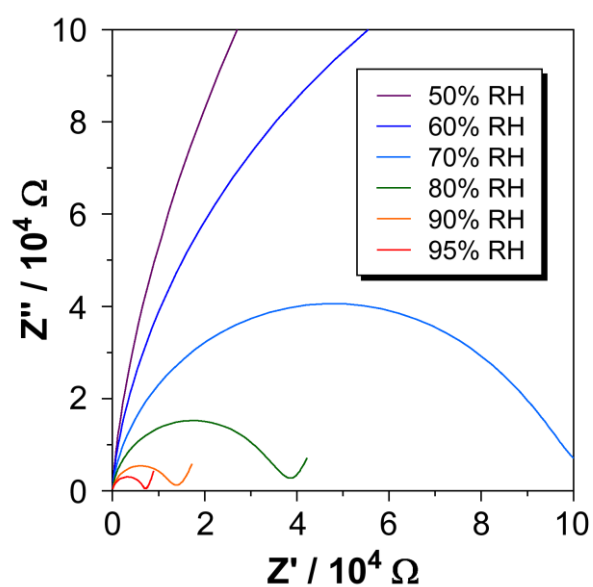

**Figure S6.** Impedance Cole-Cole plots of the nanocomposite at 25 °C, as a function of relative humidity.
